# Supplementary material for: Regulation of DNA Methylation by Cannabidiol and Its Implications for Psychiatry: New Insights from In Vivo and In Silico Models
Source: MDPI journal article supplement (doi:10.3390/genes13112165), 2022-11-20
Supplement: s1 [file s1]

## Supplementary Material

### In Silico Evaluation of Cannabidiol Affinity to DNA Methyltransferases through Molecular Docking Assays

Molecular docking calculations were performed using Glide - Schrödinger, considering the ligands flexible and the protein rigid. The structure of the cannabidiol (CBD) was retrieved from the PubChem repository (PUBCHEM ID 13956-29-1). The CBD ligand was docked into DNMTs using the Maestro Glide software in extra-precision (XP) mode [121]. The protein structures were prepared using the Protein Preparation Wizard tool [122], adding the hydrogen atoms and minimizing the energy, using the OPLS-2005 force field [123]. The CBD ligand was prepared through the LigPrep tool, correcting protonation, according to Epik, generating conformers and performing energy minimization [122,124]. The protein grid coordinates for all DNMTs were centered around the co-crystallized ligands in their active pocket sites with a radius distance of 10 Å. For DNMT1, the grid was centered around the ligand GSK3685032, a potent first-in-class DNMT1-selective inhibitor [118]. For DNMT3A and DNMT3B, the grid was centered around the ligand s-adenosyl-L-homocysteine (SAH), an endogenous inhibitor [119,120]. For the docking calculations, these co-crystallized ligands were excluded from the grid to avoid possible bias interactions with CBD. To allow a possible comparison with CBD docking scores, the co-crystallized ligands were extracted from the protein structure as new entries, prepared through a similar protocol with LigPrep and submitted to docking calculations using the Maestro Glide software in the same extra-precision (XP) mode. Docking scores were expressed as kcal mol<sup>-1</sup> as a parameter of potential ligand affinity. More recently, ligand efficiency (LE), defined as affinity or docking scores divided by the number of heavy atoms in a molecule, was introduced as a useful parameter to guide the selection of promising drug candidates [125]. Both parameters were represented for CBD and co-crystallized ligands in the selected protein targets. The non-covalent interactions between CBD and the proteins were represented in 2D-diagrams generated by Maestro suite. The PyMOL Molecular Graphics System, Schrödinger, LLC was used for the visual inspection of the docking poses and to render the 3D molecular images.

**Table S1.** Docking results of cannabidiol against DNA methyltransferases (DNMTs).

| Protein | PDB ID | Drug                            | Docking Score<br>(kcal mol <sup>-1</sup> ) | Ligand<br>Efficiency |
|---------|--------|---------------------------------|--------------------------------------------|----------------------|
| DNMT1   | 6X9J   | Cannabidiol                     | -6.230                                     | -0.271               |
|         |        | GSK3685032                      | -7.689                                     | -0.240               |
| DNMT3A  | 6BRR   | Cannabidiol                     | -5.684                                     | -0.247               |
|         |        | S-adenosyl-L-homocysteine (SAH) | -8.685                                     | -0.334               |
| DNMT3B  | 6U8P   | Cannabidiol                     | -2.897                                     | -0.126               |
|         |        | S-adenosyl-L-homocysteine (SAH) | -10.564                                    | -0.406               |

Abbreviations: CBD – cannabidiol; DNMTs - DNA methyltransferases; PDB ID: Protein Data Bank Identification.
